# Supplementary material for: Off-the-shelf allogeneic natural killer cells for the treatment of COVID-19
Source: PubMed Central journal article supplement — Mol Ther Methods Clin Dev. 2024 Oct 28;32(4):101361. doi: 10.1016/j.omtm.2024.101361 (PMC11609367; doi:10.1016/j.omtm.2024.101361), 2024-10-28
Supplement: mmc1.pdf [file mmc1.pdf]

**OMTM, Volume 32**

**Supplemental information**

**Off-the-shelf allogeneic natural killer cells  
for the treatment of COVID-19**

**Winnie L. Liu, Eleftheria Kampouri, John K. Bui, Mandeep K. Sekhon, Almudena Tercero, Dan Finlay, Liya H. Asghedom, Gladys R. Romasanta, Natalie T. Rice, Fatima Ranjbaran, Carrie Stoltzman, Jody Cook, Joe Blake, Colleen S. Delaney, and Joshua A. Hill**

## Supplemental Tables and Figures

**Table S1.** Summary of Adverse Events

| Event Term                                                | Dose: 100 x 10 <sup>6</sup><br>(n=3) | Dose: 300 x 10 <sup>6</sup><br>(n=3) | Dose: 900 x 10 <sup>6</sup><br>(n=3) | All Participants<br>(n=9) |
|-----------------------------------------------------------|--------------------------------------|--------------------------------------|--------------------------------------|---------------------------|
| <b>Any Adverse Event</b>                                  | 12                                   | 9                                    | 7                                    | 28                        |
| Allergic Reaction                                         | 0                                    | 2                                    | 0                                    | 2                         |
| Dyspepsia                                                 | 0                                    | 1                                    | 1                                    | 2                         |
| Dyspnea                                                   | 1                                    | 0                                    | 1                                    | 2                         |
| Epistaxis                                                 | 1                                    | 1                                    | 0                                    | 2                         |
| Lung Infection                                            | 1                                    | 0                                    | 1                                    | 2                         |
| Nausea                                                    | 1                                    | 0                                    | 1                                    | 2                         |
| Alanine Aminotransferase Increase                         | 1                                    | 0                                    | 0                                    | 1                         |
| Arthralgia                                                | 0                                    | 1                                    | 0                                    | 1                         |
| Aspartate Aminotransferase Increase                       | 1                                    | 0                                    | 0                                    | 1                         |
| Chest Wall Pain                                           | 1                                    | 0                                    | 0                                    | 1                         |
| Disseminated Intravascular Coagulation                    | 1                                    | 0                                    | 0                                    | 1                         |
| Dizziness                                                 | 0                                    | 1                                    | 0                                    | 1                         |
| Dysgeusia                                                 | 1                                    | 0                                    | 0                                    | 1                         |
| Hiccups                                                   | 0                                    | 1                                    | 0                                    | 1                         |
| Hyperbilirubinemia                                        | 1                                    | 0                                    | 0                                    | 1                         |
| Insomnia                                                  | 1                                    | 0                                    | 0                                    | 1                         |
| Nasal Congestion                                          | 0                                    | 1                                    | 0                                    | 1                         |
| Palpitations                                              | 0                                    | 0                                    | 1                                    | 1                         |
| Phlebitis                                                 | 0                                    | 1                                    | 0                                    | 1                         |
| Rash                                                      | 0                                    | 0                                    | 1                                    | 1                         |
| Sepsis                                                    | 1                                    | 0                                    | 0                                    | 1                         |
| Sinus Tachycardia                                         | 0                                    | 0                                    | 1                                    | 1                         |
| <b>Adverse Event Potentially Related to Study Product</b> | 0                                    | 0                                    | 0                                    | 0                         |
| <b>Serious Adverse Event (all unrelated)</b>              | 2                                    | 0                                    | 1                                    | 3                         |
| <b>Death</b>                                              | 0                                    | 0                                    | 0                                    | 0                         |

No adverse events were assessed as potentially related. There were three serious AEs in two participants with active hematologic malignancies due to sepsis with bacteremia and recurrent COVID-19 in one participant and recurrent COVID-19 in a second participant in the context of weaning of corticosteroids.

**Table S2: Adverse Event Severity per Participant**

| Participant       | CTCAE Term                             | Severity Grade | Relatedness to DVX201 | SAE | AE Details as relevant                                             |
|-------------------|----------------------------------------|----------------|-----------------------|-----|--------------------------------------------------------------------|
| <b>DVX201-001</b> | Epistaxis                              | 1              | Not related           | No  |                                                                    |
|                   | Nausea                                 | 1              | Not related           | No  |                                                                    |
|                   | Insomnia                               | 2              | Not related           | No  |                                                                    |
| <b>DVX201-002</b> | Alanine aminotransferase increased     | 3              | Not related           | No  | Related to underlying malignancy (ALL) and receipt of chemotherapy |
|                   | Aspartate aminotransferase increased   | 3              | Not related           | No  | Related to underlying malignancy (ALL) and receipt of chemotherapy |
|                   | Disseminated intravascular coagulation | 2              | Not related           | No  | Related to underlying malignancy (ALL) and receipt of chemotherapy |
|                   | Hyperbilirubinemia                     | 3              | Not related           | No  |                                                                    |
|                   | Sepsis                                 | 4              | Not related           | Yes | Admitted for neutropenic fever and bacteremia.                     |
|                   | Lung Infection                         | 4              | Not related           | Yes | COVID-19 exacerbation requiring ICU admission                      |
| <b>DVX201-003</b> | Dyspnea                                | 3              | Not related           | No  |                                                                    |
|                   | Dysgeusia                              | 2              | Not related           | No  |                                                                    |
|                   | Chest Wall Pain                        | 2              | Not related           | No  |                                                                    |
| <b>DVX201-004</b> | Phlebitis                              | 2              | Not related           | No  |                                                                    |
|                   | Hiccups                                | 1              | Not related           | No  |                                                                    |
|                   | Epistaxis                              | 1              | Not related           | No  |                                                                    |
| <b>DVX201-006</b> | Allergic reaction                      | 1              | Not related           | No  |                                                                    |
|                   | Dizziness                              | 1              | Not related           | No  |                                                                    |
|                   | Dyspepsia                              | 2              | Not related           | No  |                                                                    |
|                   | Allergic Reaction                      | 2              | Not related           | No  |                                                                    |
|                   | Dizziness                              | 1              | Not related           | No  |                                                                    |
|                   | Arthralgia                             | 1              | Not related           | No  |                                                                    |
|                   | Nasal Congestion                       | 1              | Not related           | No  |                                                                    |

|                   |                    |   |             |     |                                                     |
|-------------------|--------------------|---|-------------|-----|-----------------------------------------------------|
| <b>DVX201-008</b> | Lung Infection     | 3 | Not related | Yes | Hospitalization for recurrent symptoms of COVID-19. |
|                   | Palpitation        | 2 | Not related | No  |                                                     |
|                   | Dyspnea            | 2 | Not related | No  |                                                     |
|                   | Sinus tachycardia  | 2 | Not related | No  |                                                     |
| <b>DVX201-009</b> | Rash maculopapular | 2 | Not related | No  |                                                     |

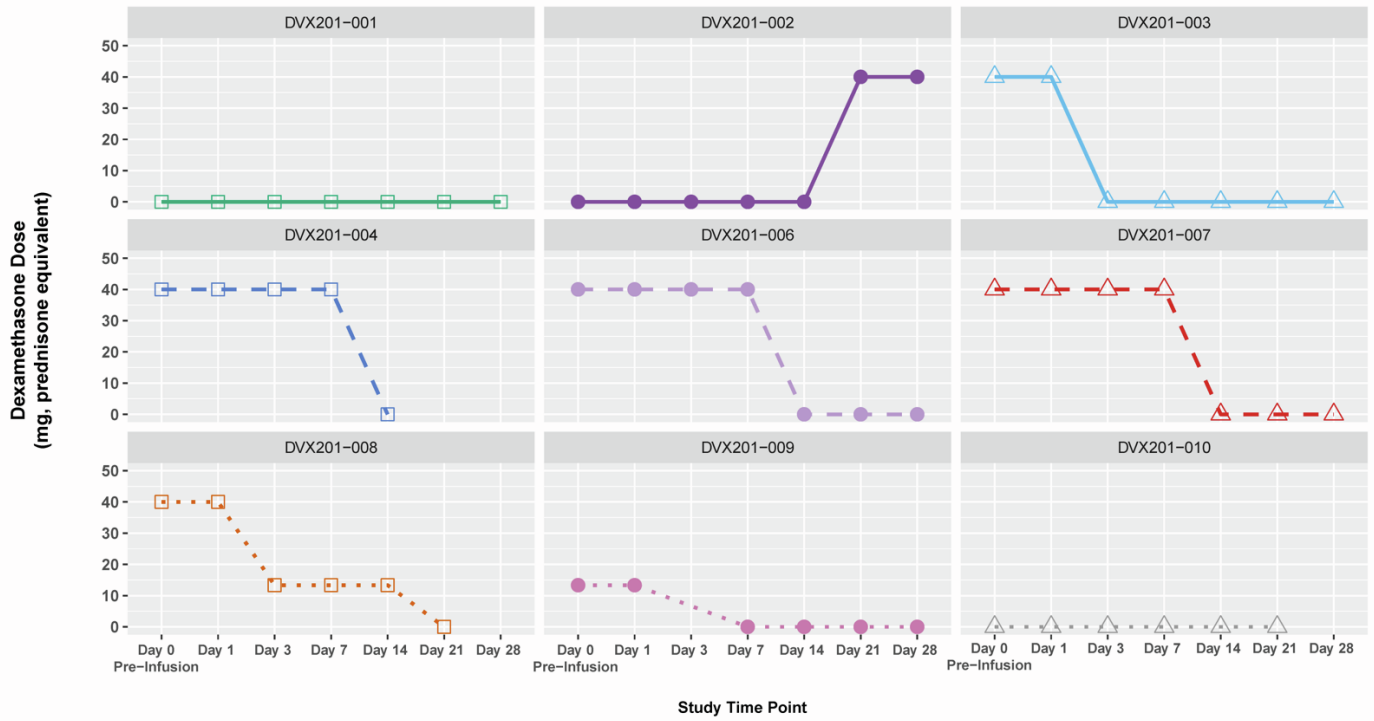

**Figure S1:** Corticosteroid use by participants during the study

Participant-level plots of the dexamethasone dose (in prednisone equivalence) at each study timepoint.

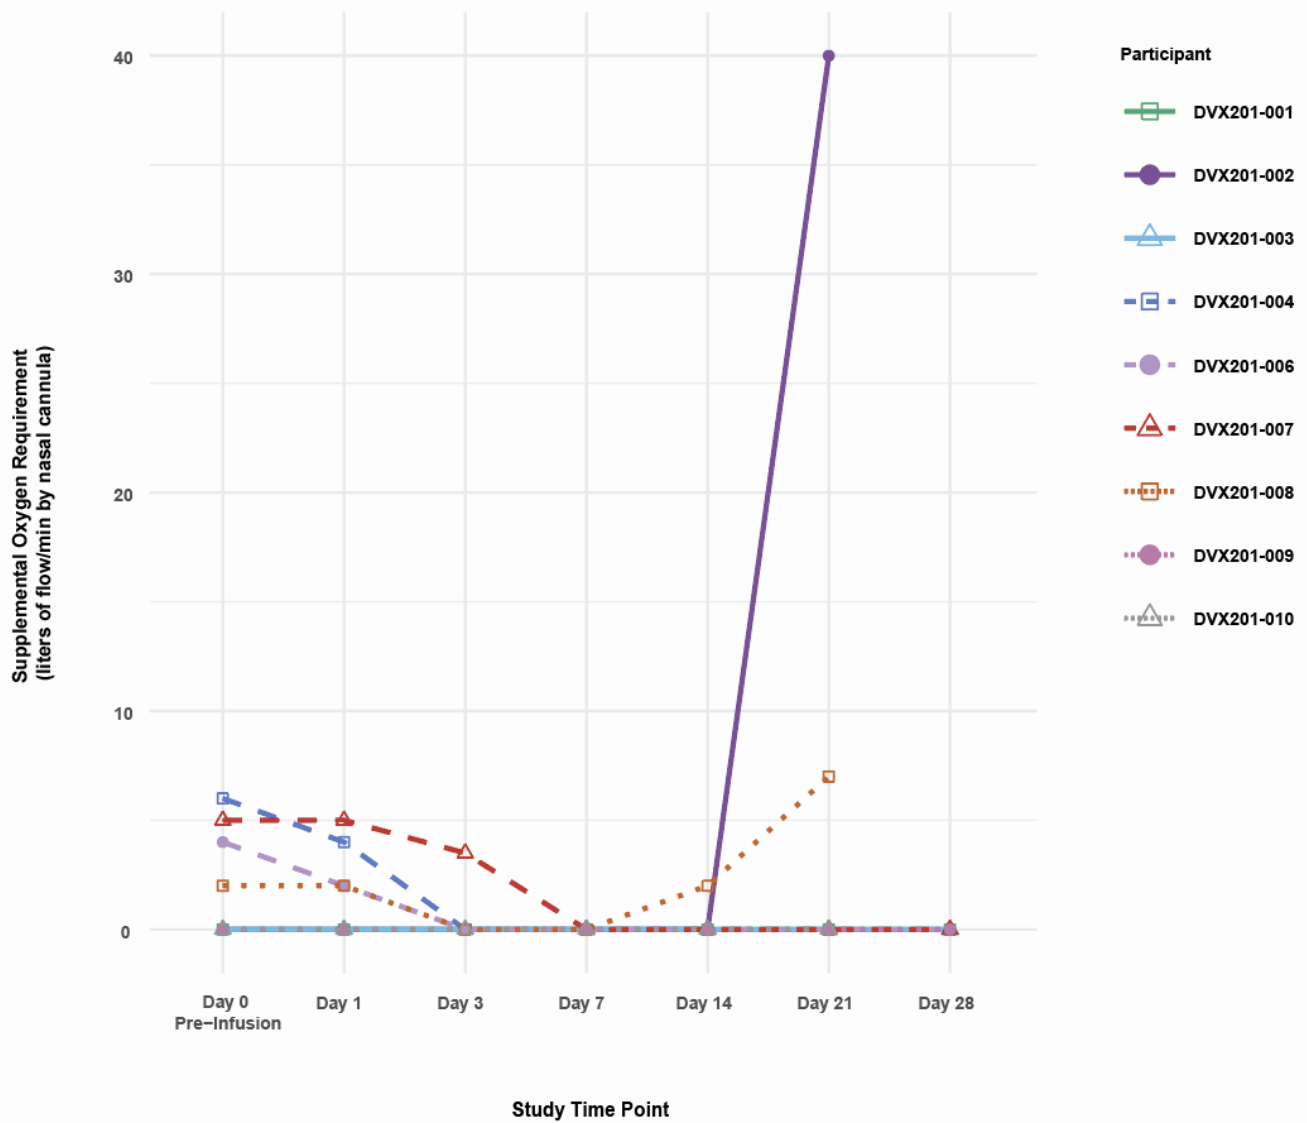

**Figure S2:** Kinetics of supplemental oxygen use

Spaghetti plot of the supplemental oxygen requirement in liters at each study timepoint. Each line represents an individual participant. Participants DVX201-002 and DVX201-008 were readmitted for worsening respiratory symptoms attributed to recurrent/persistent COVID-19.

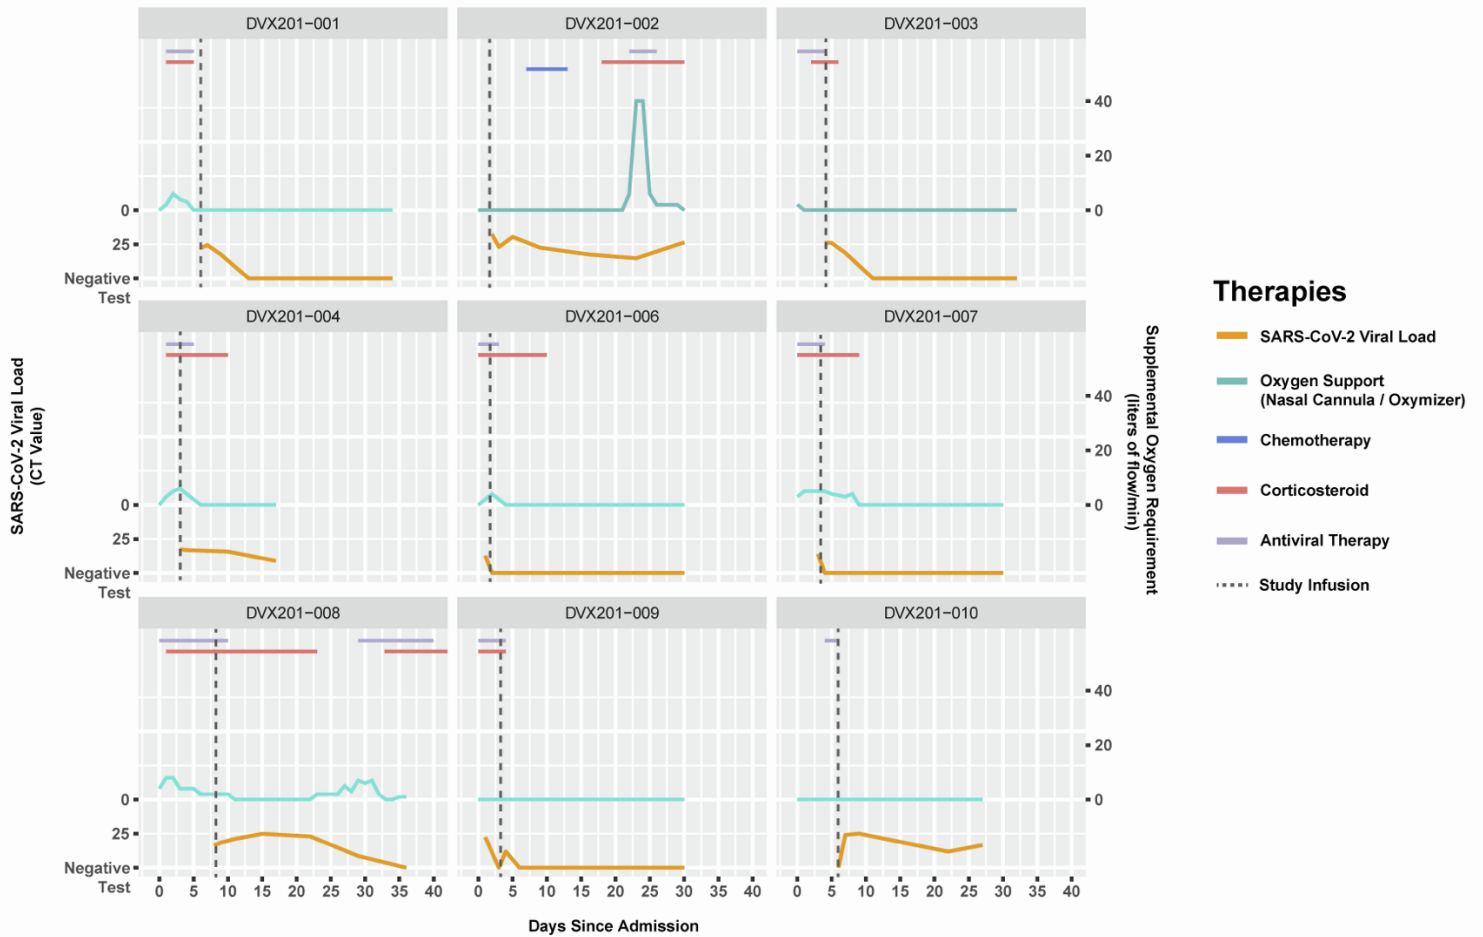

**Figure S3.** Dual-axis spaghetti plots of the kinetics of supplemental oxygen usage, SARS-CoV-2 detection, and concurrent therapies per day after hospital admission

For SARS-CoV-2 viral loads, the figure depicts the cycle threshold (CT) value, wherein a lower CT value indicates a higher viral load. Participant DVX201-002 also received casirivimab/imdevimab (Regeneron) on Day 1.

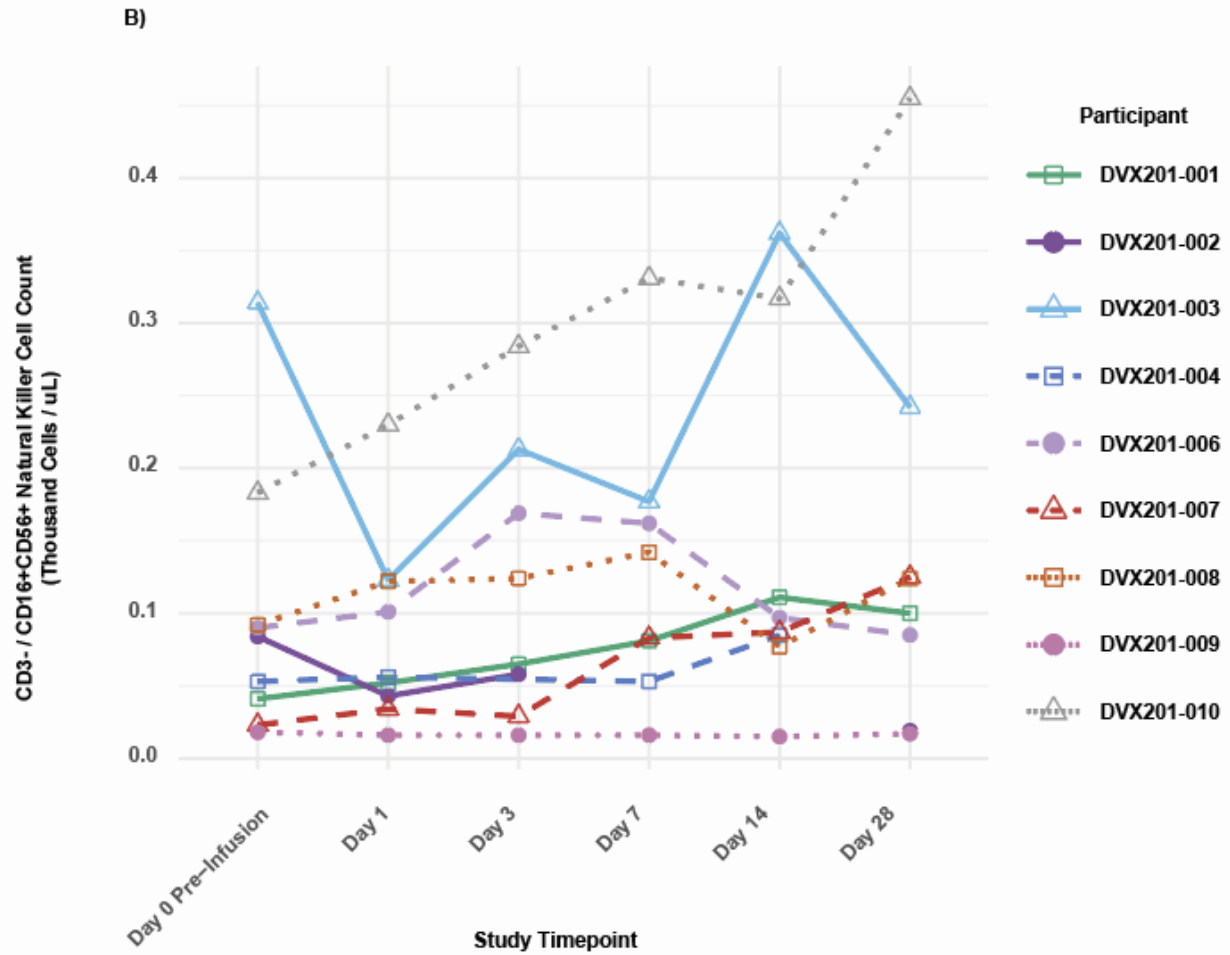

**Figure S4.** Kinetics of CD3- / CD16+CD56+ NK cell counts

Spaghetti plots of NK cell counts at each study timepoint per participant.



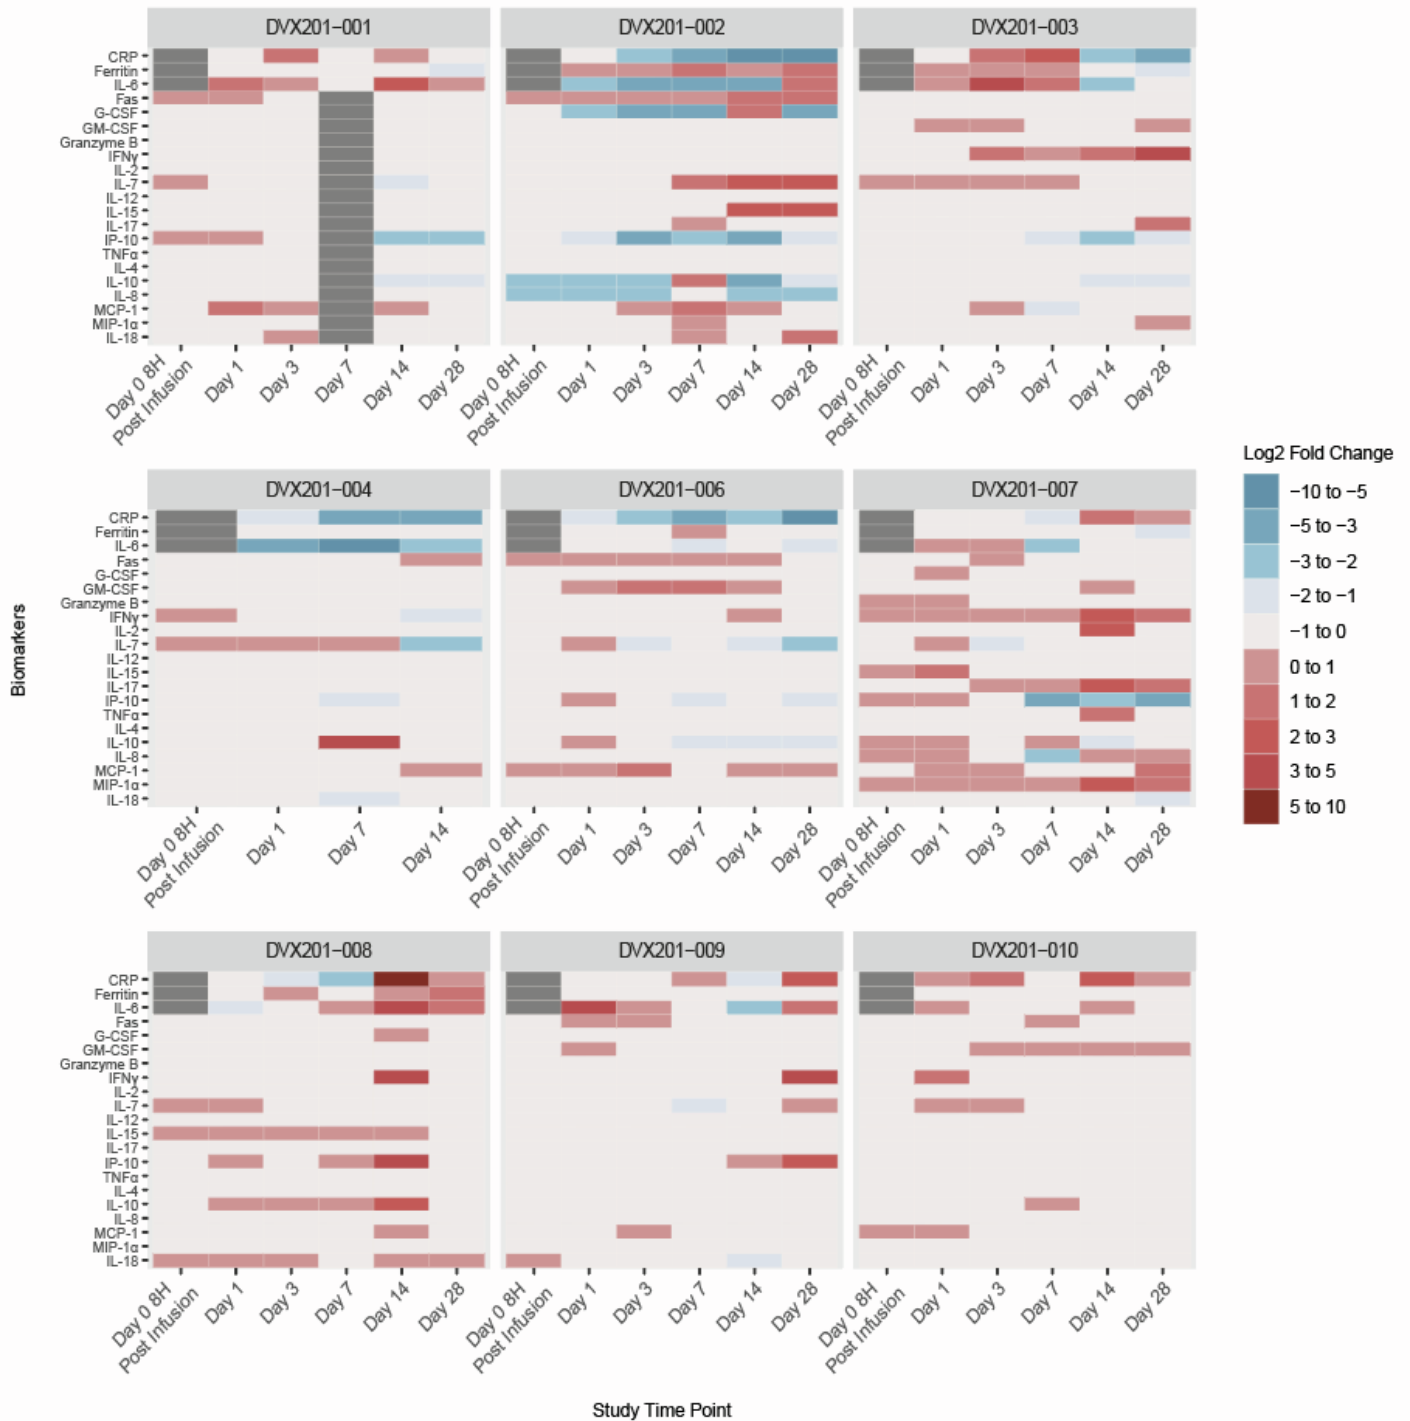

**Figure S5.** Heat map of the kinetics of exploratory cytokines and/or inflammatory biomarkers based on fold changes compared to baseline time points.

Heat maps for each participant are depicted in separate panels in order of dose level (3 participants pre increasing dose level). The heat maps depict fold changes ( $\log_2$ ) for each time point relative to the Day 0 (pre-

infusion) baseline sample per participant. Biomarkers are displayed in each panel in order of (top to bottom) cytokines, chemokines, enzymes, growth factors, acute phase proteins, and cell surface receptors. Red colors indicate an increase and blue colors indicate a decrease in values.

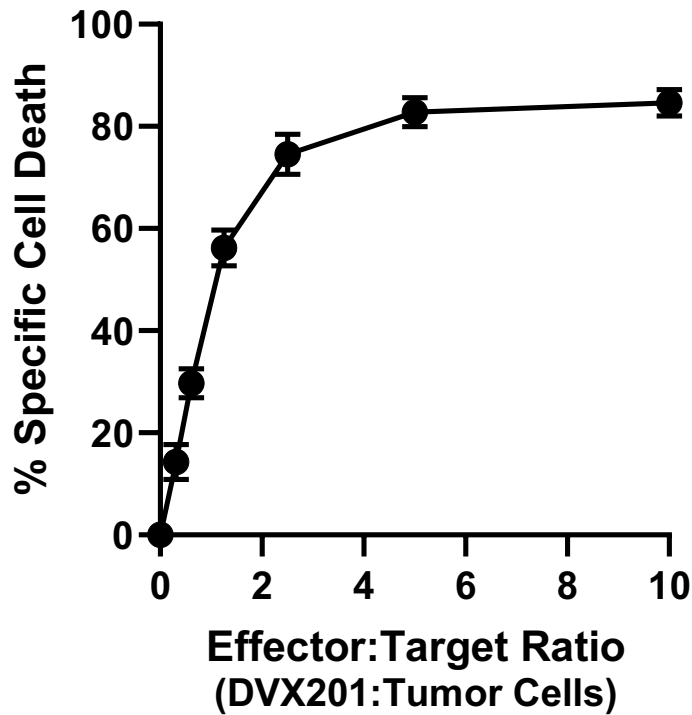

**Figure S6.** Functionality of four unique batches of DVX201 NK cell product using an in vitro cytotoxicity assay. A constant number of GFP-expressing Kasumi-1 target cells were co-cultured with DVX201 effector cells in a range of effector-to-target cell ratios for 24hrs in a 37°C incubator. Cells were labeled with DAPI at the end of incubation and assessed by flow cytometry for the percentage of dead/dying DAPI+ GFP+ Kasumi-1 cells. Results from these assays were generated for information only as part of the batch records. Specific cell death of the target cells was determined using the following equation:

$$\left[ \frac{(\% \text{ Sample Cell Death} - \% \text{ Spontaneous Cell Death})}{(100 - \% \text{ Spontaneous Cell Death})} \right] \times 100 = \% \text{ Specific Cell Death}$$
